# Supplementary material
Source: Springer Nature journal article supplement (https://www.springermedizin.de/resource/supplementary/12875_2011_645_MOESM1_ESM.pdf/9434858)
Supplement: MOESM1 [file 9434858]

Recruit 50 practices territory-wide from HK primary care  
Invite all eligible patients presenting on 1 randomly assigned day  
each month over 12 months

Screen 7500 patients with PHQ9  
CES-D 20, SF-12, demographic data, Health  
and mental health service utilization

Estimation of prevalence  
of depressive disorders

Diagnosed by GP  
to have depression  
At baseline

Not diagnosed by GP  
to have depression  
At baseline

Descriptive analysis of the  
pathways of care by  
doctors
